# Supplementary material for: Pt-based core–shell nanocatalysts with enhanced activity and stability for CO oxidation
Source: Royal Society of Chemistry journal article supplement (doi:10.1039/c3cc45957h), 2013-01-01
Supplement: c3cc45957h.pdf [file c3cc45957h.pdf]

5 **Pt-based Core-shell Nanocatalysts with Enhanced  
Activity and Stability for CO Oxidation**

Chengxi Zhang, Shuirong Li, Tuo Wang, Gaowei Wu, Xinbin Ma, and Jinlong Gong\*

10 *Key Laboratory for Green Chemical Technology of Ministry of Education, School of  
Chemical Engineering and Technology, Tianjin University; Collaborative Innovation  
Center of Chemical Science and Engineering, Tianjin 300072, China*

15 \*Corresponding author: [jlgon@tju.edu.cn](mailto:jlgon@tju.edu.cn); Fax: +86 22 87401818;

## 1 Catalysts preparation

**Synthesis of Pt@SiO<sub>2</sub>:** The process was carried out using the Stöber method by following the reported method with a modification.<sup>1</sup> For the synthesis of Pt nanoparticles, 15 ml of aqueous 10 mM K<sub>2</sub>PtCl<sub>4</sub> (Aldrich, 99.9%) and 37.5 ml of 400 mM TTAB (Aldrich, 99%) were mixed with 88.5 ml of deionized water in a 500-ml round bottom flask at the room temperature. The mixture was stirred at the room temperature for 10 min and was heated at 50 °C for 10 min., and then 9 ml of 500 mM ice-cooled NaBH<sub>4</sub> (Aldrich, 98%) solution was injected through the septum using a syringe to the above clear solution. The gas evolved inside the flask was released by inserting a needle through the septum for 20 min. The resultant solution was kept at 50 °C for 15 h. The product was centrifuged at 8000 rpm for 30 min. The supernatant solution was separated and centrifuged again at 11000 rpm for 15 min, twice. The Pt nanoparticle colloids were collected and re-dispersed in 15 ml of deionized water by sonication. The as-prepared Pt nanoparticle colloid ( $1.5 \times 10^{-4}$  mol) dispersed in 15 ml of deionized water was added to 35.5 ml of deionized water. A NaOH solution (3.0 ml of 0.05 M) was added to the aqueous Pt colloid solution with stirring to adjust the pH of the solution to around 10-11. To this basic solution, a controlled amount of 10 vol% TEOS (Tetraethylorthosilicate) diluted with methanol was added to initiate the silica polymerization. The as-synthesized Pt@SiO<sub>2</sub> was calcined at 400 °C for 2 h in static air to remove TTAB surfactants to generate Pt@SiO<sub>2</sub> catalysts.

[1] S. H. Joo, J. Y. Park, C.-K. Tsung, Y. Yamada, P. Yang and G. A. Somorjai, *Nat Mater*, 2009, **8**, 126

**Synthesis of Pt@SiO<sub>2</sub>@CeO<sub>2</sub>:** Pt@SiO<sub>2</sub>@CeO<sub>2</sub> was prepared by a chemical precipitation method in accordance with the following procedure. The obtained Pt@SiO<sub>2</sub> spheres after grinded and 664 mg Ce(NO<sub>3</sub>)<sub>3</sub>·6H<sub>2</sub>O (JK Chemical, 99.9%) was dispersed or dissolved in 30 ml ethanol through an ultrasonic treatment process for 15 min. Subsequently, 2.2 g HMT (hexamethylenetetramine) (JK Chemical, 99%) dissolved in 20 ml deionized water

was added to the fully dispersed particle solution with ultrasonic vibrations for another 15 min. The mixture was then stirred for 2 h in a water bath maintained at 70 °C. The obtained solids were washed by ethanol and water until PH=7. Then they were dried at 60 °C overnight and calcined at 400 °C for 2 h, thus get Pt@SiO<sub>2</sub>@CeO<sub>2</sub> catalyst.

**5 Synthesis of Pt@CeO<sub>2</sub>:** Pt@CeO<sub>2</sub> was prepared by a leaching method. The as prepared Pt@SiO<sub>2</sub>@CeO<sub>2</sub> was dispersed in a concentrated NaOH solution (2M). The mixture was stirred at 60 °C for 2 h, then the solids were washed with large amount of water until PH=7. The obtained solids were then dried at 120 °C overnight, thus get Pt@CeO<sub>2</sub>.

**Synthesis of Pt/CeO<sub>2</sub>:** Pt/CeO<sub>2</sub> was prepared by a co-precipitation method used as a reference catalyst. Appropriate amount of H<sub>2</sub>PtCl<sub>6</sub> and Ce(NO<sub>3</sub>)<sub>3</sub>·6H<sub>2</sub>O ((Pt wt.) : (CeO<sub>2</sub> wt.) = 1:100) was dissolved in 100 ml deionized water, and then solution of 5×10<sup>-2</sup> mol/L NaOH was added into the above solution until PH value reaches 9. The resultant reaction mixture was aged for 1 h under agitation. After aging step, the reaction mixture was washed and filtered to attain the solid, which was subsequently dried overnight and calcined at 400 °C for 2 h to obtain 1%Pt/CeO<sub>2</sub>.

## 2. Activity test:

Catalytic tests were conducted at the atmospheric pressure in a quartz fixed-bed reactor (Φ10 × 30 mm) loaded with 0.05 g catalysts (20-40 mesh) mixed with 1 ml of quartz particles. The catalysts were pre-reduced with 10%H<sub>2</sub>/N<sub>2</sub> for 1 h at 400 °C. After reduction the catalyst was purged with nitrogen for 30 min at the same temperature. The total feed flow rate was held constant at 100 ml/min, with flowing N<sub>2</sub>. The activity tests were performed with molar ratio O<sub>2</sub>/CO/N<sub>2</sub> = 1/1/3, at different temperatures, ranging from 100 to 350 °C, the stability test was performed at 250 °C.

The conversion of CO was defined as follows:

$$CO\text{ converion }(\%) = \frac{[CO_2]_{out}}{[CO]_{in}} \times 100$$

### 3. Characterization:

BET (Brunauer-Emmett-Teller) surface areas and pore structure of catalysts were measured using a Micromeritics Tristar 3000 analyzer by nitrogen adsorption at -196 °C.

5 The specific surface areas were calculated from the isotherms using the BET method, and the pore distribution and the cumulative volumes of pores were obtained by the BJH (Barrett-Joyner-Halenda) method from the desorption branches of the adsorption isotherms.

Elemental analysis of catalysts was performed on an ICP-OES (Varian Vista-MPX) at a  
10 high frequency emission power of 1.5 kW and a plasma airflow of 15.0 L/min ( $\lambda_{Pt} = 214.424$  nm,  $\lambda_{Si} = 251.611$  nm,  $\lambda_{Ce} = 418.659$  nm).

X-ray diffraction patterns (XRD) were recorded with a Bruker D8 Focus operated at 40 kV and 40 mA equipped with a nickel-filtered Cu K $\alpha$  radiation ( $\lambda = 1.54056$  Å) and a  $2\theta$  ranging from 10 to 85° at a scanning rate of 0.02°/step and 0.15 s/step.

15 Transmission electron microscope (TEM) images were obtained on a FEI Tecnai G2 F20 transmission electron microscope at 100 kV. The sample powder was dispersed in ethanol by sonification; drops of the suspension were applied onto a copper grid-supported transparent carbon foil and dried in air.

Table S1 Element composition (EDX analysis/ICP results)

| Element weight<br>/ %                 | Pt        | Si        | Ce        | O         |
|---------------------------------------|-----------|-----------|-----------|-----------|
| Pt@SiO <sub>2</sub>                   | 45.9/17.6 | 17.5/38.4 | —         | 36.6/43.9 |
| Pt@SiO <sub>2</sub> @CeO <sub>2</sub> | 8.0/11.9  | 2.4/25.9  | 68.3/26.5 | 21.4/35.7 |
| Pt@CeO <sub>2</sub>                   | 10.3/21.9 | 0.6/1.6   | 70.2/49.0 | 18.9/21.4 |

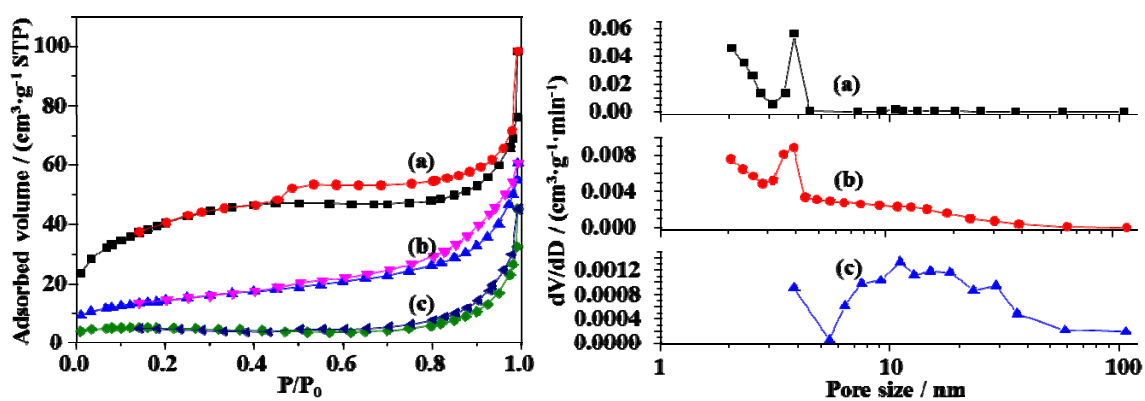

Figure S1 N<sub>2</sub> adsorption-desorption isotherms and pore size distribution curves calculated by the BJH equation in desorption branches of the core-shell catalysts (a) Pt@SiO<sub>2</sub>, (b) Pt@SiO<sub>2</sub>@CeO<sub>2</sub>, (c) Pt@CeO<sub>2</sub>.

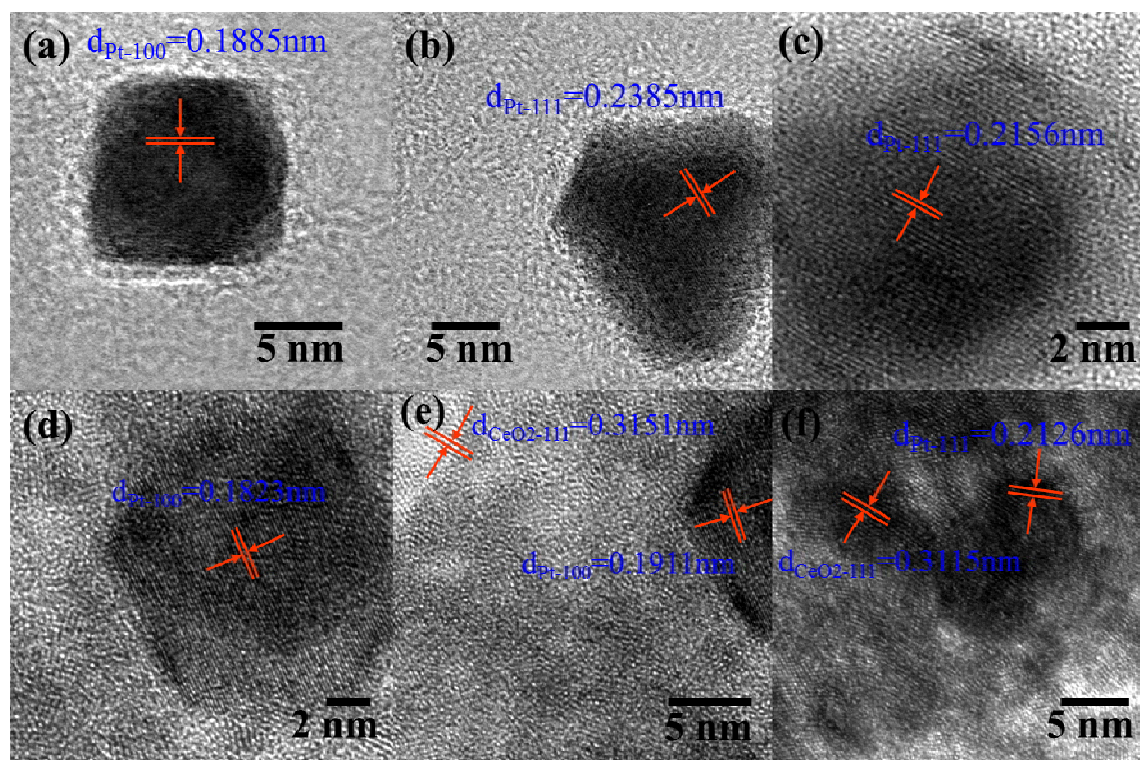

Figure S2 HRTEM image of the Pt-based core-shell catalysts, (a) (b): TTAB capped Pt particles, (c): Pt@SiO<sub>2</sub>, (d) (e): Pt@SiO<sub>2</sub>@CeO<sub>2</sub>, (f): Pt@CeO<sub>2</sub>

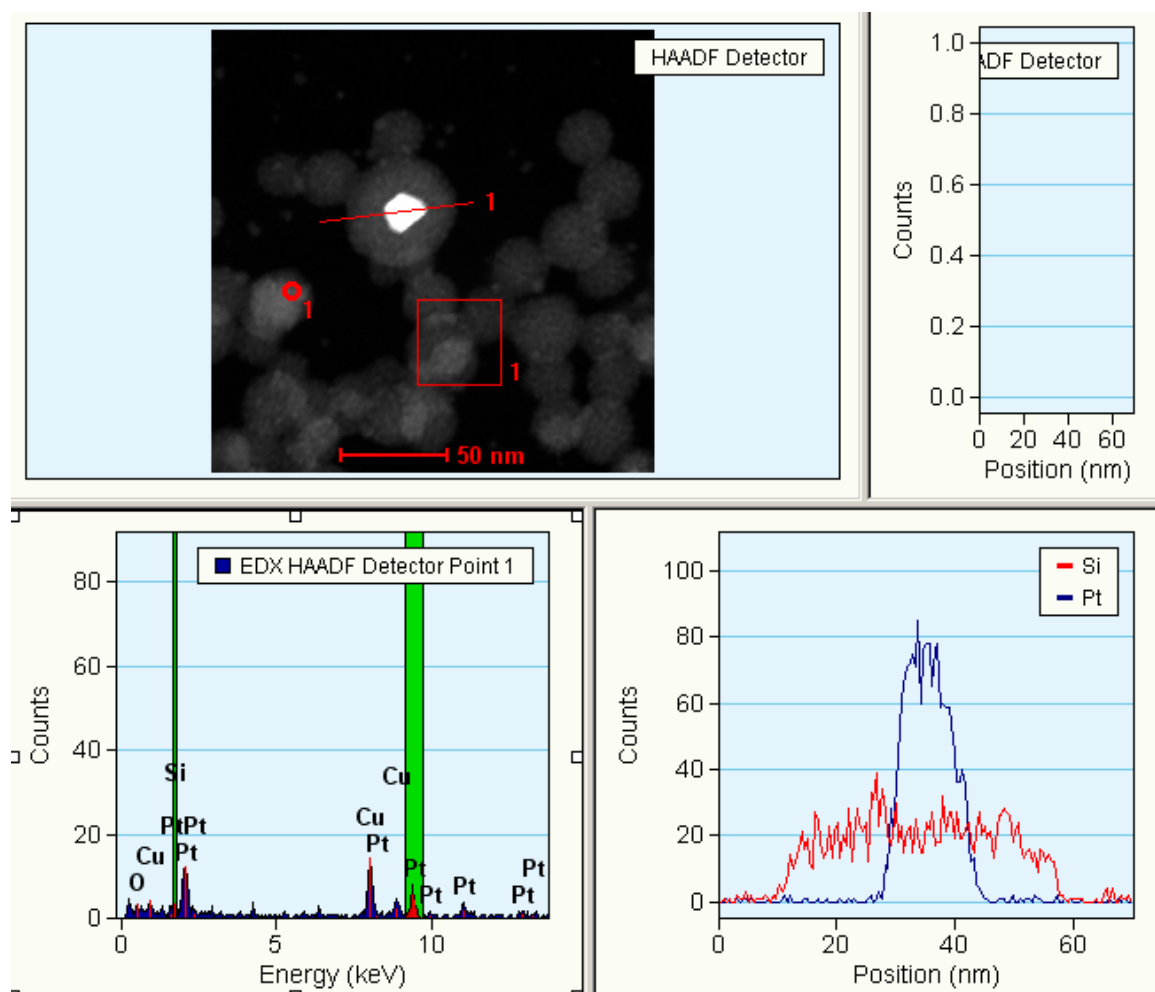

Figure S3 EDX-line scanning results of Pt@SiO<sub>2</sub>



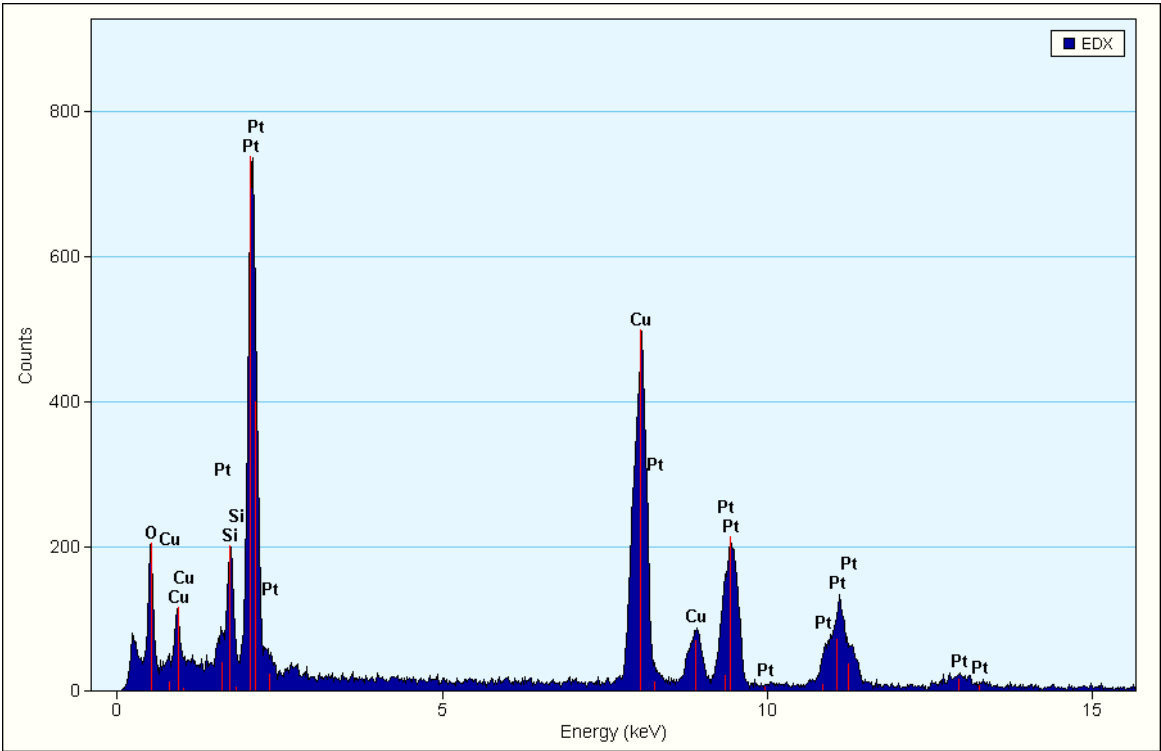

Figure S4 EDX scanning results of Pt@SiO<sub>2</sub>

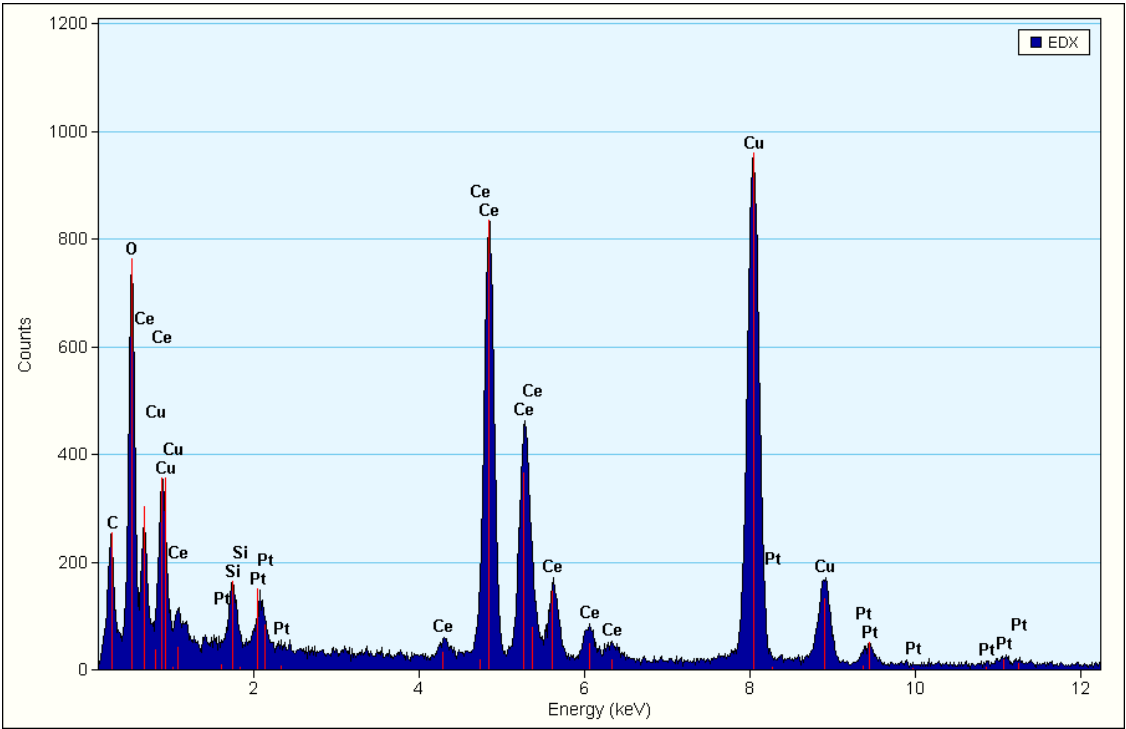

Figure S5 EDX scanning results of Pt@SiO<sub>2</sub>@CeO<sub>2</sub>

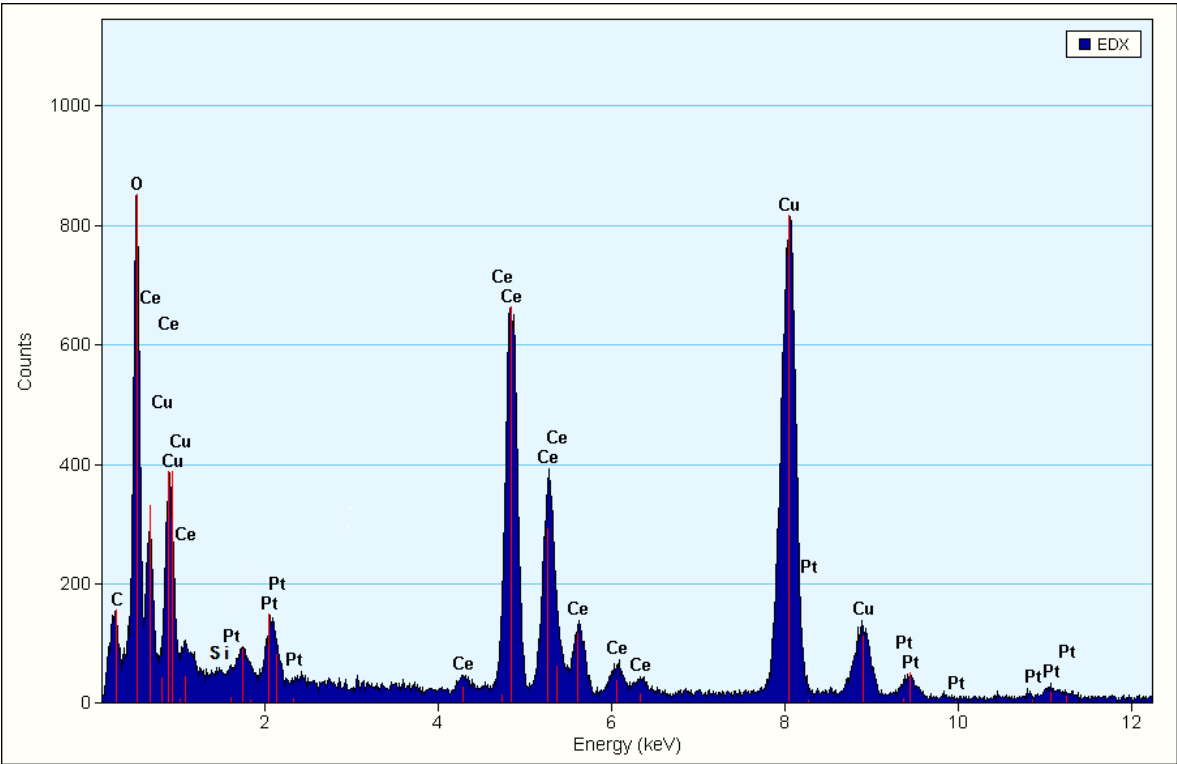

Figure S6 EDX scanning results of Pt@CeO<sub>2</sub>

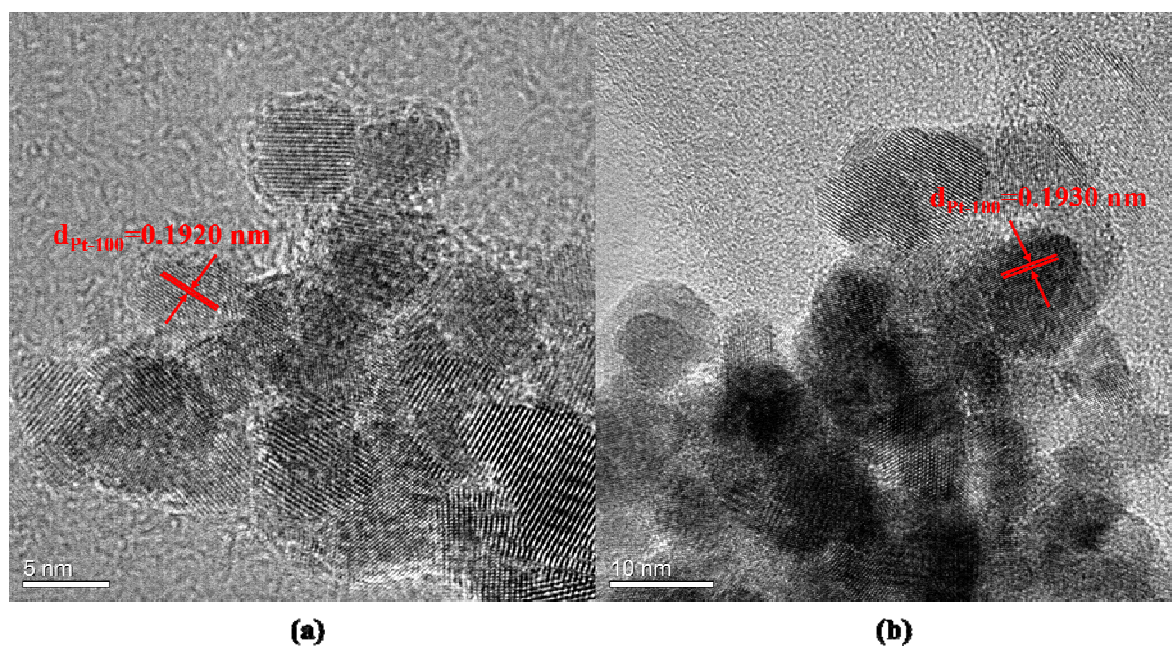

Figure S7 TEM images of the Pt/CeO<sub>2</sub> catalyst before (a) and after (b) stability test
